# Supplementary material for: Iodonium functionalized polystyrene as non-chemically amplified resists for electron beam and extreme ultraviolet lithography
Source: Royal Society of Chemistry journal article supplement (doi:10.1039/d4lp00136b), 2024-01-01
Supplement: d4lp00136b1.pdf [file d4lp00136b1.pdf]

## Supporting Information

### Iodonium Functionalized Polystyrene as Non-Chemically Amplified Resists for Electron Beam and Extreme Ultraviolet Lithography

Xindi Yao,<sup>†</sup> Peng Lian,<sup>†</sup> Jinping Chen,<sup>\*,†</sup> Yi Zeng,<sup>†</sup> Tianjun Yu,<sup>†</sup> Shuangqing Wang,<sup>‡</sup> Xudong Guo,<sup>‡</sup> Rui Hu,<sup>‡</sup> Peng Tian,<sup>#</sup> Michaela Vockenhuber,<sup>#</sup> Dimitrios Kazazis,<sup>#</sup> Yasin Ekinici,<sup>\*,#</sup> Guoqiang Yang<sup>\*,‡</sup> and Yi Li<sup>\*,†</sup>

#### Table of Contents

1. Characterization of PSNA<sub>0.4</sub> and the films
2. Solubility characterization and lithographic performances of the resist in different organic developers
3. Normalized remaining thickness (NRT) analysis
4. LER measurement of high-resolution SEM images
5. Mechanistic analysis of PSNA<sub>0.4</sub> resist pattern generations
6. Etch resistance and pattern transfer capability of the PSNA<sub>0.4</sub> resist

# 1. Characterization of PSNA<sub>0.4</sub> and the films

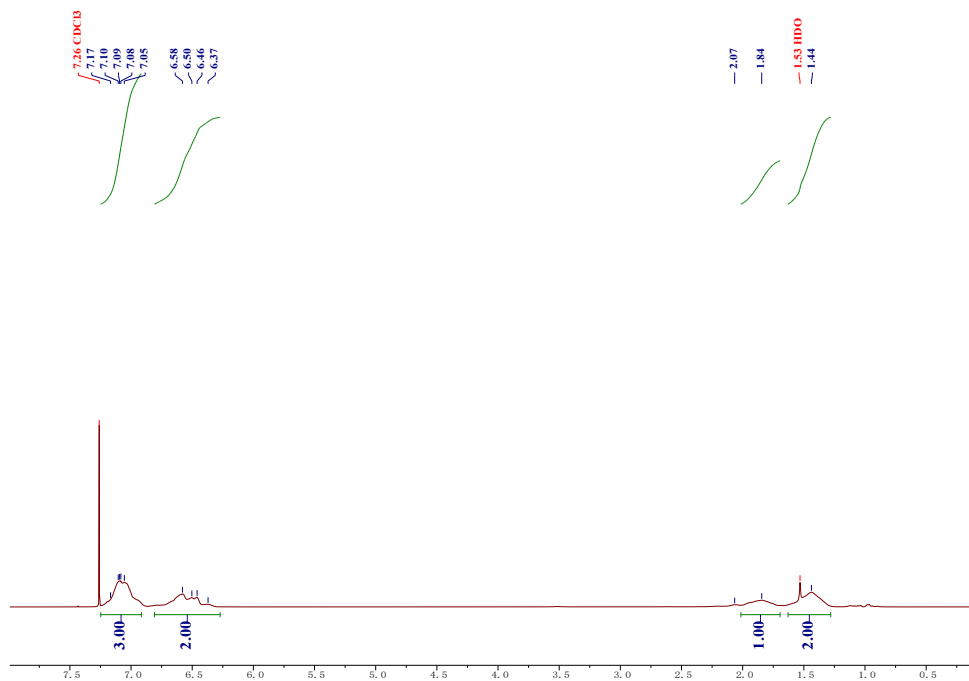

Figure S1. <sup>1</sup>H NMR spectrum of PS (CDCl<sub>3</sub>, 600 MHz)

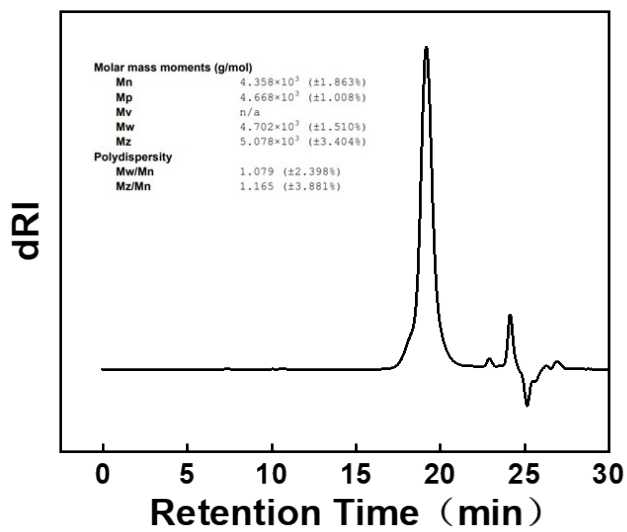

Figure S2. GPC spectrum of PS (Mw=4700, PDI=1.08)

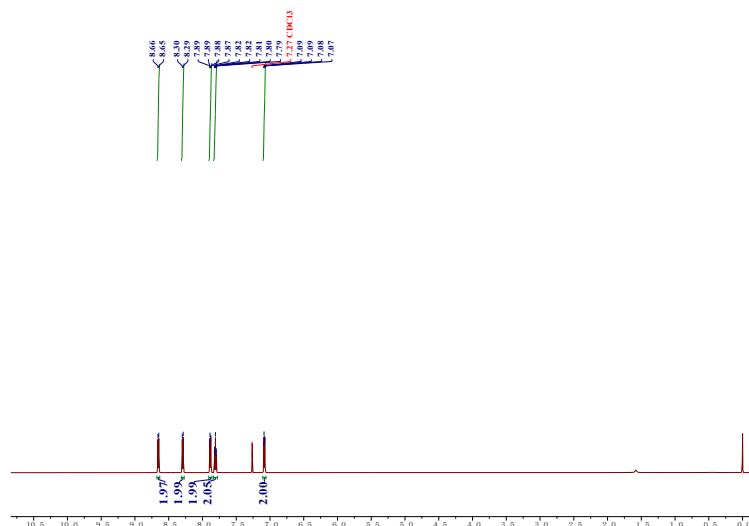

**Figure S3.** <sup>1</sup>H NMR spectrum of N-(p-iodophenyl)-1,8-naphthalimide (CDCl<sub>3</sub>, 600 MHz)

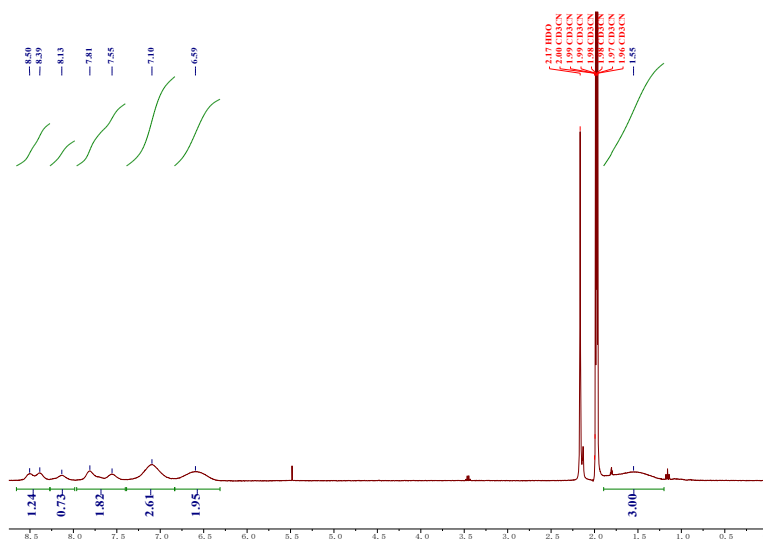

**Figure S4.** <sup>1</sup>H NMR spectrum PSNA<sub>0.4</sub> (CD<sub>3</sub>CN, 600 MHz)

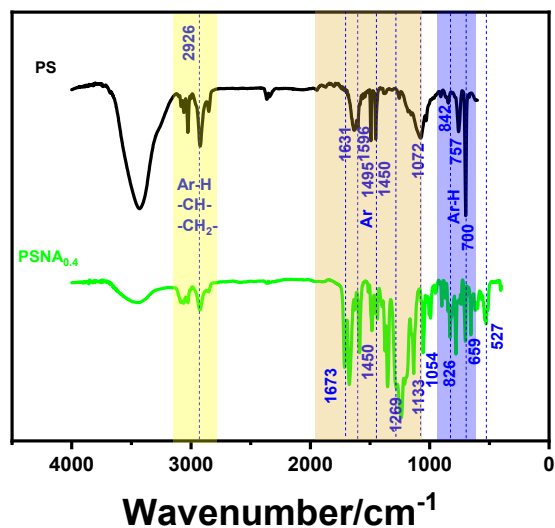

Figure S5. FTIR spectrum of PS and PSNA<sub>0.4</sub>

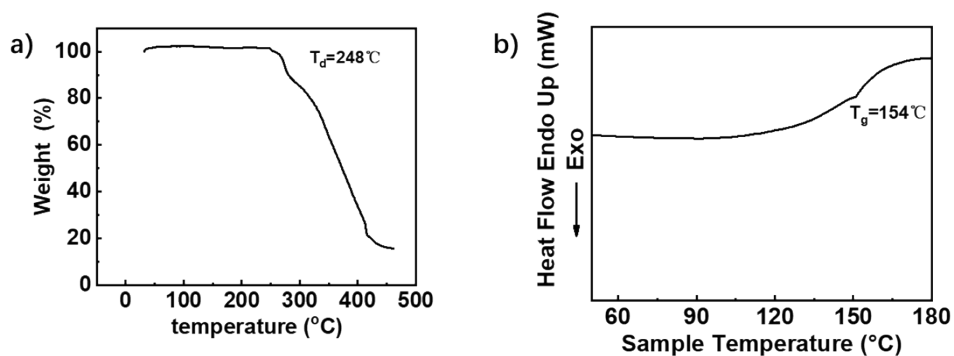

Figure S6. (a) TGA plot of the PSNA<sub>0.4</sub> at a heating rate of 10 °C min<sup>-1</sup> under an N<sub>2</sub> atmosphere. (b) DSC curve of the PSNA<sub>0.4</sub> at a heating rate of 10 °C min<sup>-1</sup> under an N<sub>2</sub> atmosphere.

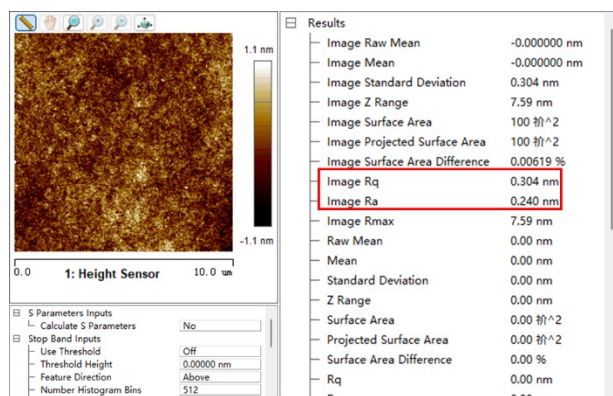

Figure S7. Roughness measurement of PSNA<sub>0.4</sub> using AFM

## 2. Solubility characterization and lithographic performances of the resist in different organic developers:

To get an optimal developer, the solubility characteristic of PSNA<sub>0.4</sub> film in exposed and unexposed regions was examined. The resist films were exposed to a mercury lamp ( $\lambda = 254$  nm) for 180 s without masks, and then developed for 60 s with different developer solutions. The results are summarized in Table S1.

**Table S1.** Solubility of PSNA<sub>0.4</sub> films before and after 254 nm exposure performed at room temperature and Hansen parameters of related solvents

| Solvent                   | Before exposure (%) <sup>a</sup> | After exposure (%) <sup>a</sup> | Hansen solubility parameter (HSP) |                        |                                |
|---------------------------|----------------------------------|---------------------------------|-----------------------------------|------------------------|--------------------------------|
|                           |                                  |                                 | Dispersion ( $\delta$ D)          | Polarity ( $\delta$ P) | Hydrogen bonding ( $\delta$ P) |
| Cyclohexyl chloride       | – (97)                           | – (75)                          | 17.3                              | 5.5                    | 2.0                            |
| Toluene                   | – (98)                           | – (70)                          | 18.0                              | 1.4                    | 2.0                            |
| n-Butyl acetate           | – (95)                           | +– (54)                         | 15.8                              | 3.7                    | 6.3                            |
| MIBK                      | – (84)                           | +– (40)                         | 15.3                              | 6.1                    | 4.1                            |
| Dimethyl sulfoxide (DMSO) | + (0)                            | + (9)                           | 18.4                              | 16.4                   | 10.2                           |
| 1,4-Dioxane               | + (98)                           | +– (44)                         | 19.0                              | 1.8                    | 7.4                            |
| Isopropyl alcohol (IPA)   | – (96)                           | – (81)                          | 15.8                              | 6.1                    | 16.4                           |
| Acetonitrile              | + (0)                            | – (75)                          | 15.3                              | 18.0                   | 6.1                            |
| Butyl lactate             | + (0)                            | – (61)                          | 15.8                              | 6.5                    | 10.2                           |

+ : Soluble at room temperature; + – : partly soluble; and – : insoluble.

<sup>a</sup> The remaining thickness before / after exposure and developed in different solvents for 60s.

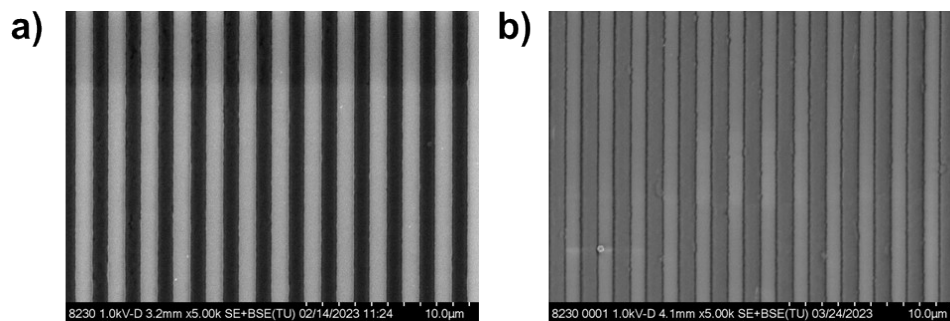

**Figure S8.** SEM images of 1  $\mu$ m line-space patterns formed by PSNA<sub>0.4</sub> developed by (a) Acetonitrile (b) n-Butyl lactate

| Developer<br>Pitch | n-BL                                                                                                               | n-BL/Acetonitrile<br>(2:1)                                                                                          | n-BL/Acetonitrile<br>(1:2)                                                                                           | Acetonitrile                                                                                                          |
|--------------------|--------------------------------------------------------------------------------------------------------------------|---------------------------------------------------------------------------------------------------------------------|----------------------------------------------------------------------------------------------------------------------|-----------------------------------------------------------------------------------------------------------------------|
| L25P50             | No image                                                                                                           | No image                                                                                                            | 1556 $\mu\text{C}/\text{cm}^2$<br>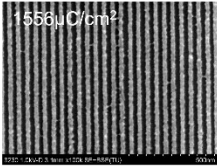 | 1415 $\mu\text{C}/\text{cm}^2$<br> |
| L30P60             | No image                                                                                                           | 1712 $\mu\text{C}/\text{cm}^2$<br> | 1556 $\mu\text{C}/\text{cm}^2$<br> | 1415 $\mu\text{C}/\text{cm}^2$<br> |
| L40P80             | 600 $\mu\text{C}/\text{cm}^2$<br> | 1712 $\mu\text{C}/\text{cm}^2$<br> | 1712 $\mu\text{C}/\text{cm}^2$<br> | 1556 $\mu\text{C}/\text{cm}^2$<br> |

**Figure S9.** SEM images of negative patterns at HP 25/30/40 nm of PSNA<sub>0.4</sub> resist developed in n-BL/Acetonitrile developers.

### 3. Normalized remaining thickness (NRT) analysis

The normalized remaining thickness (NRT) scatter plots with different development conditions were given as shown in Figure S11. After nonlinear fitting the NRT scatter plot by logistic function (a common S-shaped curve),<sup>1</sup> tangent was produced at 0.5 (NRT = 0.5) of the fitted S-shaped curve, as shown in Figure S11 (corresponding to the red line). It is considered that the NRT of photoresist increased linearly on this tangent until it increases to 1, and then stay constant. The sensitivity is defined as the lower limit of dose required to totally retain the resist ( $D_{100}$ ). The dose of the point with NRT = 0 on the tangent is considered to be the upper limit to keep the thickness of resist films unchanged ( $D_0$ ). The contrast value ( $\gamma$ ) is derived from the following formula;

$$\gamma = \frac{1}{\left\{ \log \left( \frac{D_{100}}{D_0} \right) \right\}}$$

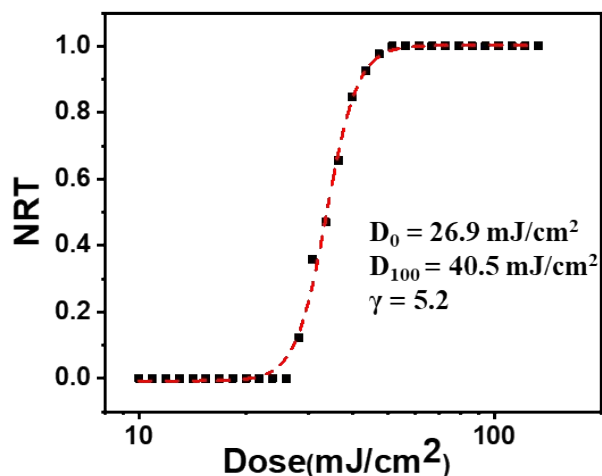

**Figure S10.** The NRT curves of PSNA<sub>0.4</sub> resist developed in acetonitrile by EUV irradiation.

#### 4. LER measurement of high-resolution SEM images

The LER parameters for all the patterns were analyzed by the software ProSEM. All the lines in the image were selected for analysis, and the LER on the left and the right were obtained respectively. The average value of them was taken as the LER value of the image.

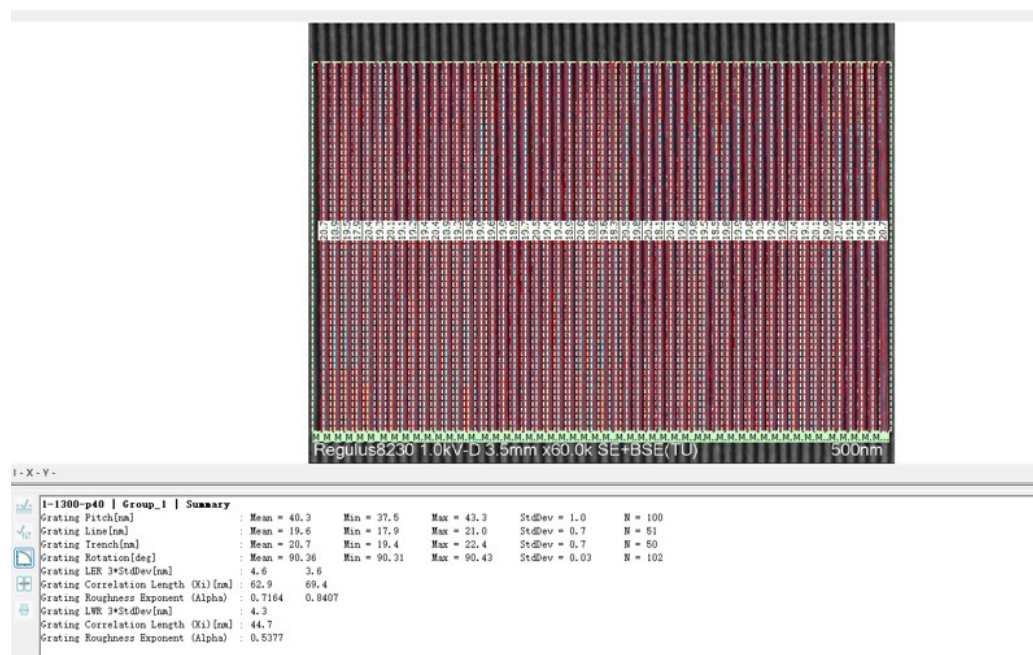

**Figure S11.** LER measurement of 20 nm L/S pattern of PSNA<sub>0.4</sub> resist in EBL.

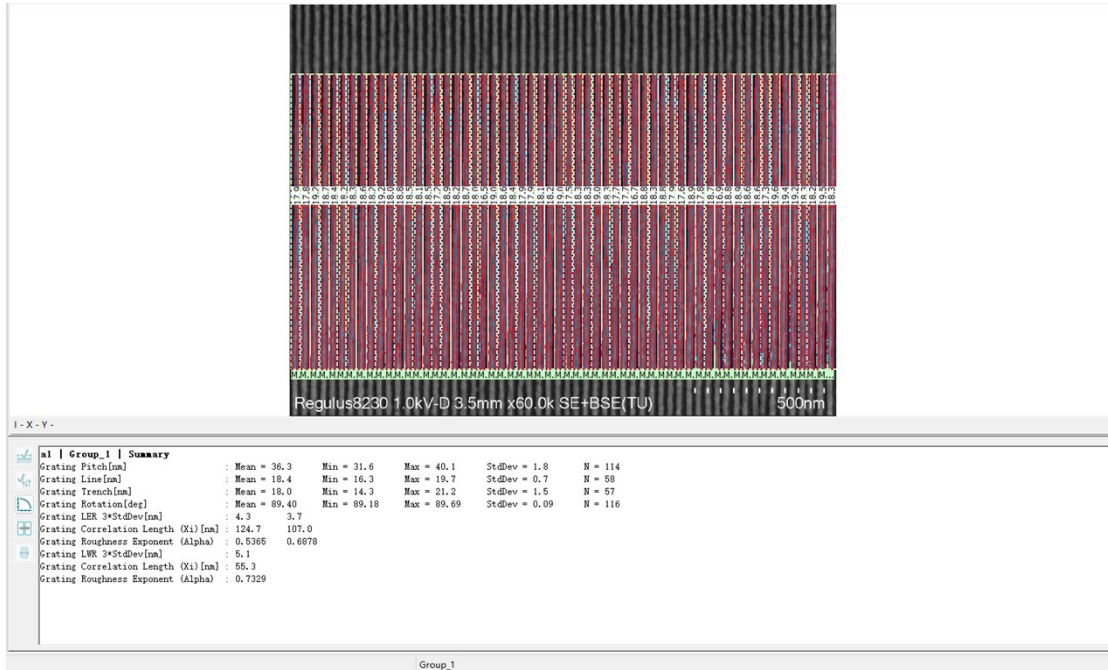

**Figure S12.** LER measurement of 18 nm L/S pattern of PSNA<sub>0.4</sub> resist in EBL.

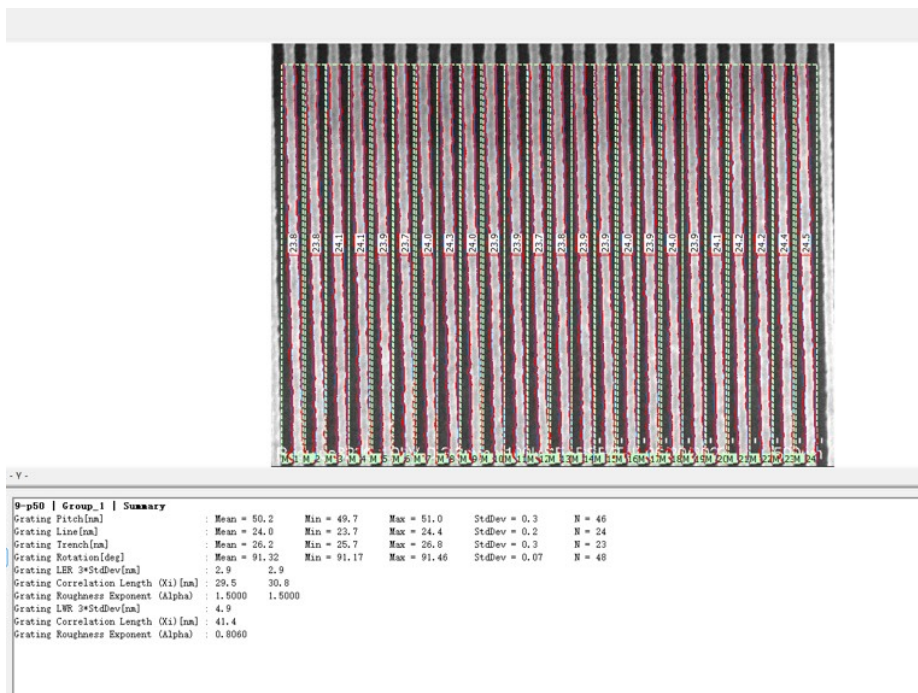

**Figure S13.** LER measurement of 25 nm L/S pattern of PSNA<sub>0.4</sub> resist in EUVL



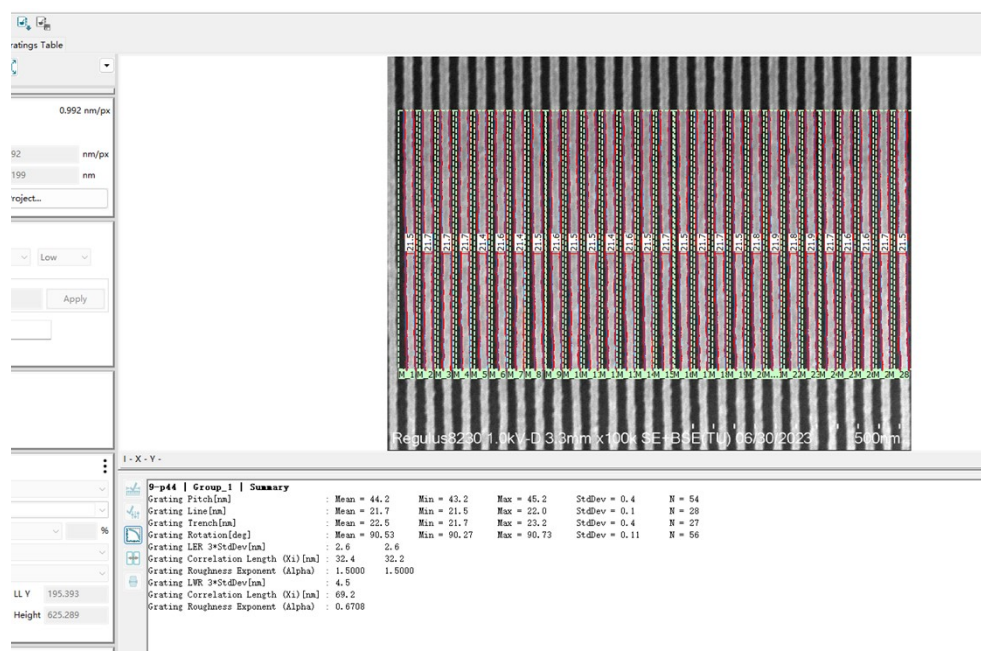

**Figure S14.** LER measurement of 22 nm L/S pattern of PSNA<sub>0.4</sub> resist in EUVL.

## 5. Mechanistic analysis of PSNA<sub>0.4</sub> resist pattern generations

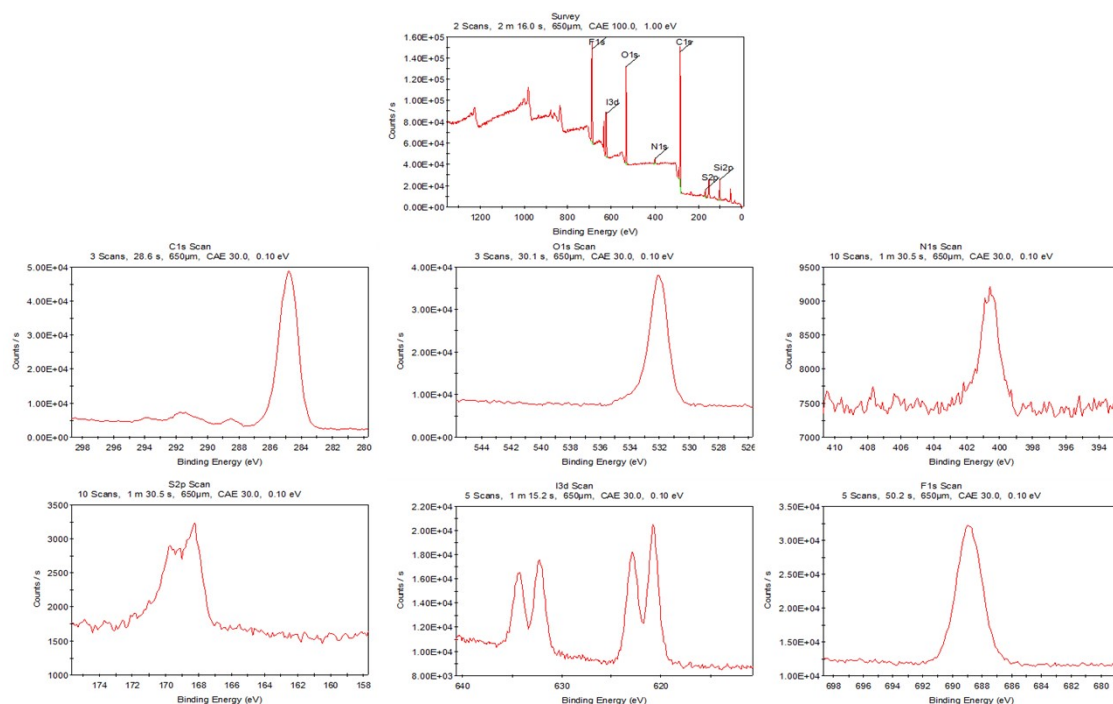

**Figure S15.** The XPS survey spectrums and high-resolution XPS spectra of C 1s, S 2p, F 1s, N 1s, I 3d and O 1s for the pristine film of PSNA<sub>0.4</sub> resist.

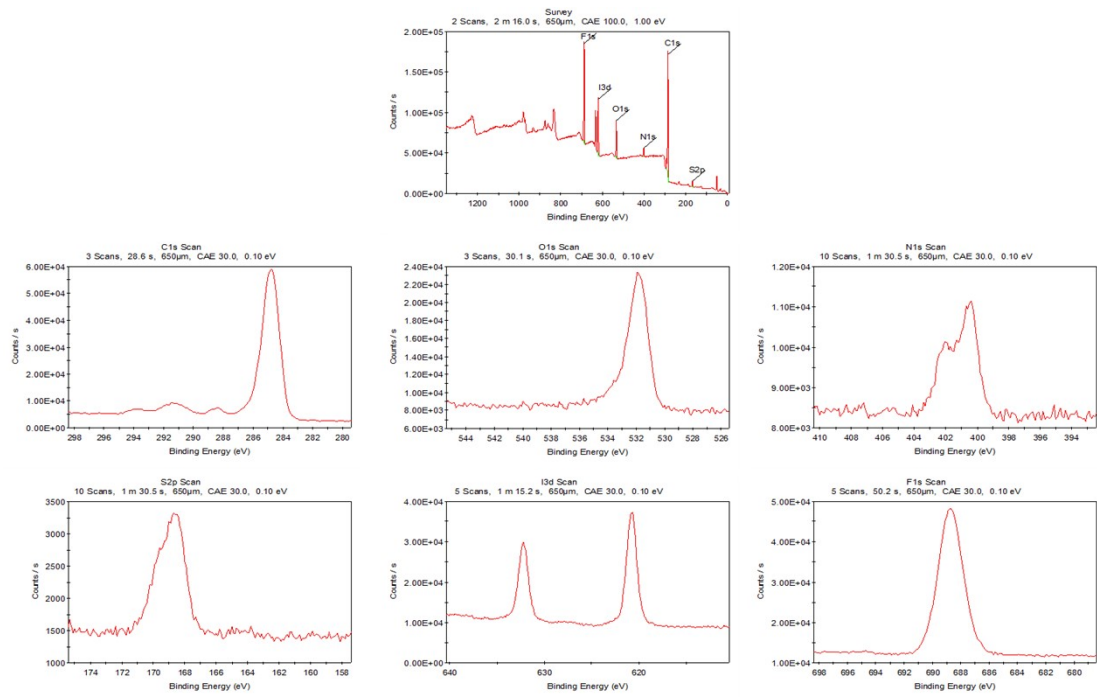

**Figure S16.** The XPS survey spectrums and high-resolution XPS spectra of C 1s, S 2p, F 1s, N1s, I 3d and O 1s for the PSNA0.4 resist films after e-beam exposure.

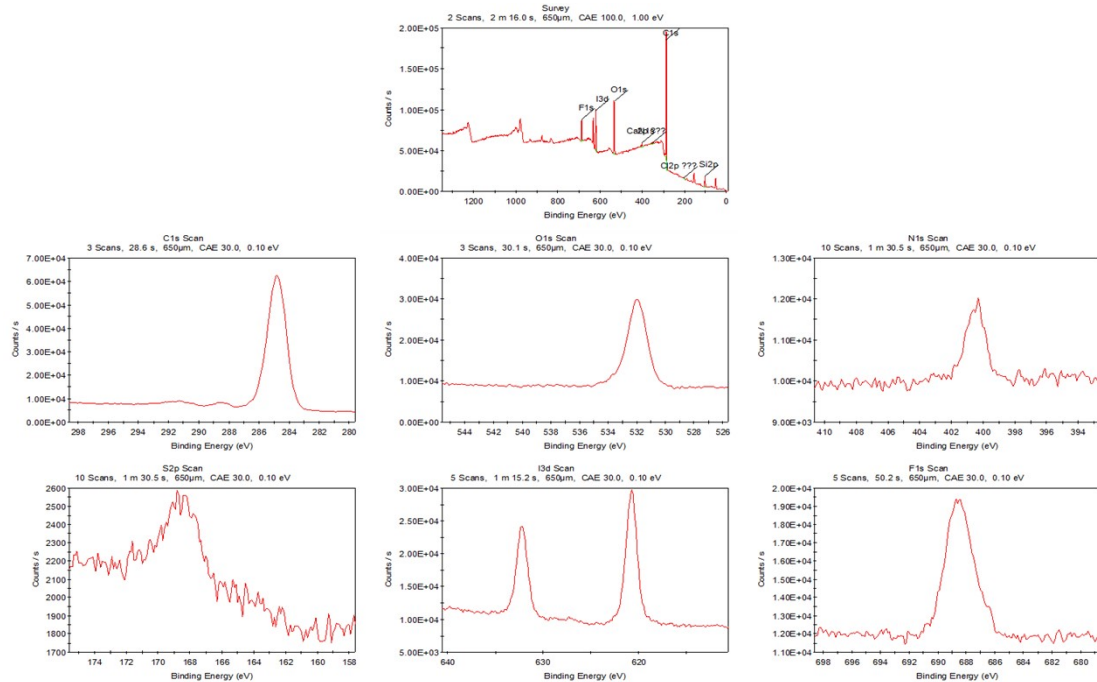

**Figure S17.** The XPS survey spectrums and high-resolution XPS spectra of of C 1s, S 2p, F 1s, N1s, I 3d and O 1s for the PSNA0.4 resist films after development.

## 6. Etch Resistance and Pattern Transfer Capability of the PSNA<sub>0.4</sub> Resist

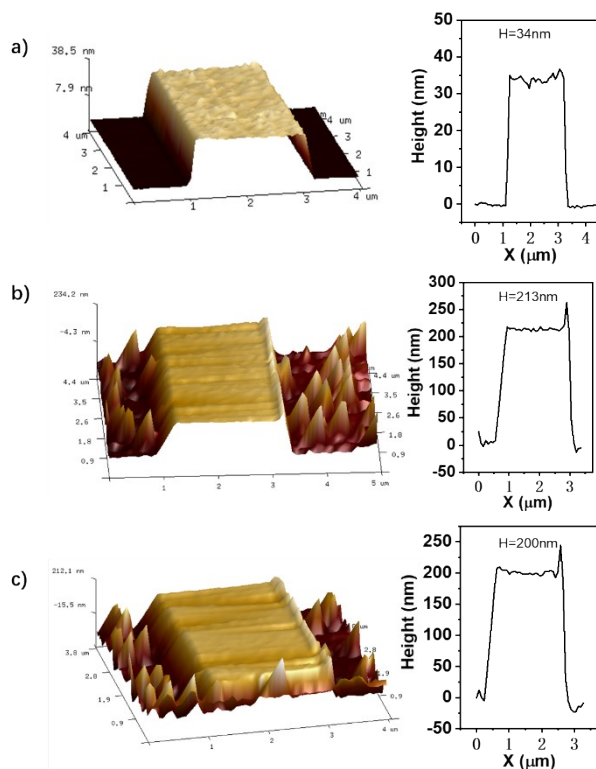

**Figure S18.** The 3D AFM topography images of the exposed PSNA<sub>0.4</sub> resist after (a) development, (b) etching and (c) resist-strip, together with height values.

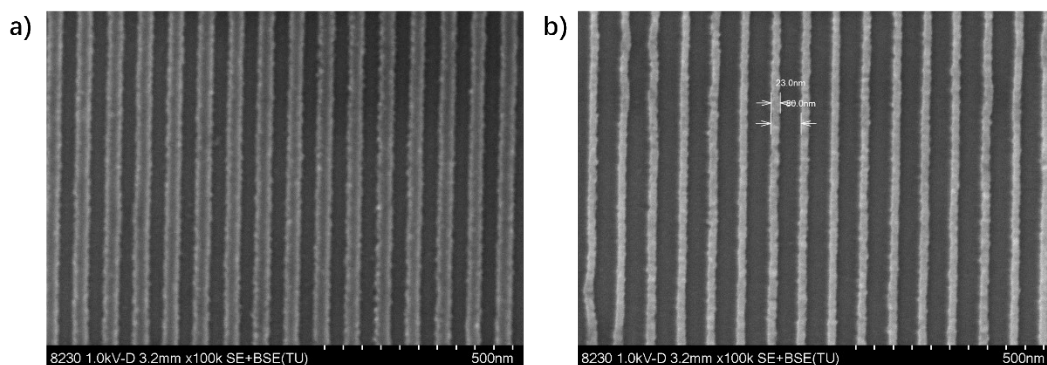

**Figure S19.** The SEM pictures of (a) 40 nm L/S (b) 20nm L/3S patterns of PSNA<sub>0.4</sub> resist upon electron beam exposure. (The samples were selected for further etching process, presented in Figure 7).

1. X.-Y. Lu, H. Luo, K. Wang, Y.-Y. Zhang, X.-F. Zhu, D. Li, B. Ma, S. Xiong, P. F. Nealey, Q. Li and G.-P. Wu, *Advanced Functional Materials*, 2021, **31**,2007417.
